# Supplementary material
Source: publisher figshare collection journal article supplement (https://acs.figshare.com/ndownloader/files/35596732)
Supplement: Supplementary file [file 35596732]

# SUPPORTING INFORMATION

for

## Revisiting the Role of Charge Transfer on the Emission Properties of Carborane-Fluorophore Systems: a TDDFT Investigation

Duygu Tahaoğlu,<sup>1</sup> Hakan Usta<sup>1</sup>, Fahri Alkan,<sup>\*1</sup>

<sup>1</sup> Department of Nanotechnology Engineering, Abdullah Gül University, Kayseri, Turkey

\*Corresponding Author

E-mail: [fahri.alkan@agu.edu.tr](mailto:fahri.alkan@agu.edu.tr)

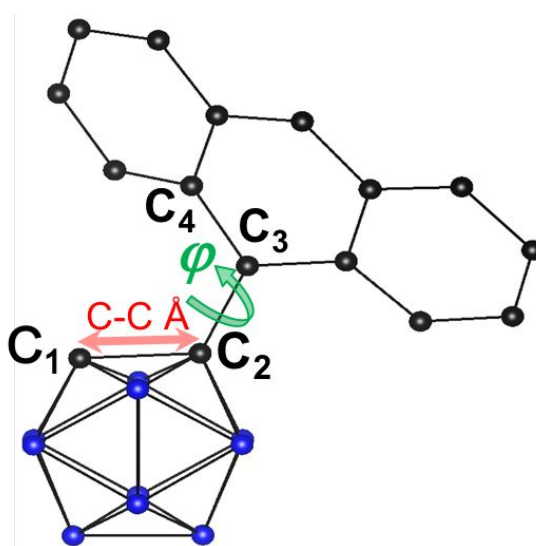

Figure S1. The illustration of important geometric parameters for excited-state geometries of *o*-CB-*Ant* along with numbering of C atoms used in the text.

Table S1. Benchmark results for the emission and absorption energies in eV (emission wavelengths in parenthesis) for different XC-functionals from the three different conformers in comparison with the experimental results.

| S <sub>1</sub> state | Emission Energies (eV)   |             |             |            |            |
|----------------------|--------------------------|-------------|-------------|------------|------------|
|                      | Experiment <sup>1</sup>  | BP86        | B3LYP       | CAM-B3LYP  | M06-2X     |
| LE                   | 2.76 (450)               | 2.20 (564)  | 2.39 (519)  | 2.59 (479) | 2.61 (476) |
| HLCT                 | 2.07 (600)               | 1.74 (713)  | 1.94 (639)  | 2.18 (570) | 2.25 (551) |
| CT                   | NA                       | 0.33 (3781) | 0.74 (1670) | 1.40 (887) | 1.31 (947) |
|                      | Absorption Energies (eV) |             |             |            |            |
|                      | Experiment <sup>1</sup>  | BP86        | B3LYP       | CAM-B3LYP  | M06-2X     |
| LE                   | 3.10 (400)               | 2.62 (474)  | 2.95 (420)  | 3.35 (370) | 3.35 (370) |

Table S1. Pictorial frontier orbitals of the three conformations for  $S_1$  state along with the orbital contributions from *o*-CB and *Ant* moieties calculated with different XC functionals.

| $S_1$ state |      | BP86                                                                                | B3LYP                                                                               | CAM-B3LYP                                                                            | M06-2X                                                                                |
|-------------|------|-------------------------------------------------------------------------------------|-------------------------------------------------------------------------------------|--------------------------------------------------------------------------------------|---------------------------------------------------------------------------------------|
| LE          | LUMO | 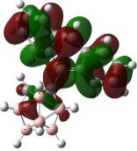   |    |    |    |
|             |      | CB: 8%, Ant: 92%                                                                    | CB: 8%, Ant: 92%                                                                    | CB: 7%, Ant: 93%                                                                     | CB: 7%, Ant: 93%                                                                      |
|             | HOMO |    |    |    |    |
|             |      | CB: 6%, Ant: 92%                                                                    | CB: 6%, Ant: 94%                                                                    | CB: 6%, Ant: 94%                                                                     | CB: 6%, Ant: 94%                                                                      |
| HLCT        | LUMO |   |   |   |   |
|             |      | CB: 62%, Ant: 38%                                                                   | CB: 60%, Ant: 40%                                                                   | CB: 48%, Ant: 52%                                                                    | CB: 43%, Ant: 57%                                                                     |
|             | HOMO |  |  |  |  |
|             |      | CB: 13%, Ant: 87%                                                                   | CB: 14%, Ant: 86%                                                                   | CB: 15%, Ant: 85%                                                                    | CB: 13%, Ant: 87%                                                                     |
| CT          | LUMO |  |  |  |  |
|             |      | CB: 96%, Ant: 4%                                                                    | CB: 96%, Ant: 4%                                                                    | CB: 96%, Ant: 4%                                                                     | CB: 96%, Ant: 4%                                                                      |
|             | HOMO |  |  |  |  |
|             |      | CB: 5%, Ant: 95%                                                                    | CB: 5%, Ant: 95%                                                                    | CB: 6%, Ant: 94%                                                                     | CB: 7%, Ant: 93%                                                                      |

Table S2.  $\Delta r$  and  $\Lambda$  values for the excited states of *o*-CB-*Ant* system with different XC functionals.

|      | BP86           |           | B3LYP          |           | CAM-B3LYP      |           | M06-2X         |           |
|------|----------------|-----------|----------------|-----------|----------------|-----------|----------------|-----------|
|      | $\Delta r$ (Å) | $\Lambda$ | $\Delta r$ (Å) | $\Lambda$ | $\Delta r$ (Å) | $\Lambda$ | $\Delta r$ (Å) | $\Lambda$ |
| LE   | 0.28           | 0.83      | 0.23           | 0.84      | 0.21           | 0.84      | 0.20           | 0.84      |
| HLCT | 1.78           | 0.65      | 1.68           | 0.67      | 1.06           | 0.71      | 0.92           | 0.73      |
| CT   | 4.18           | 0.22      | 4.14           | 0.22      | 3.89           | 0.24      | 3.85           | 0.25      |

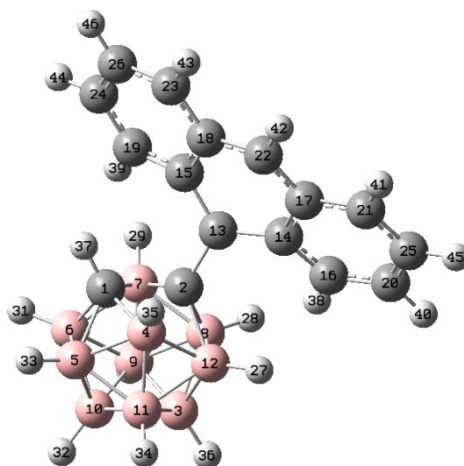

Figure S2. Atomic labels for the heat maps of TDM (H atoms are not given in the heat maps). *o*-CB atoms are numbered as 1-12 (left and down in TDM plots) whereas *Ant* atoms are numbered as 13-26. (right and up in TDM plots)

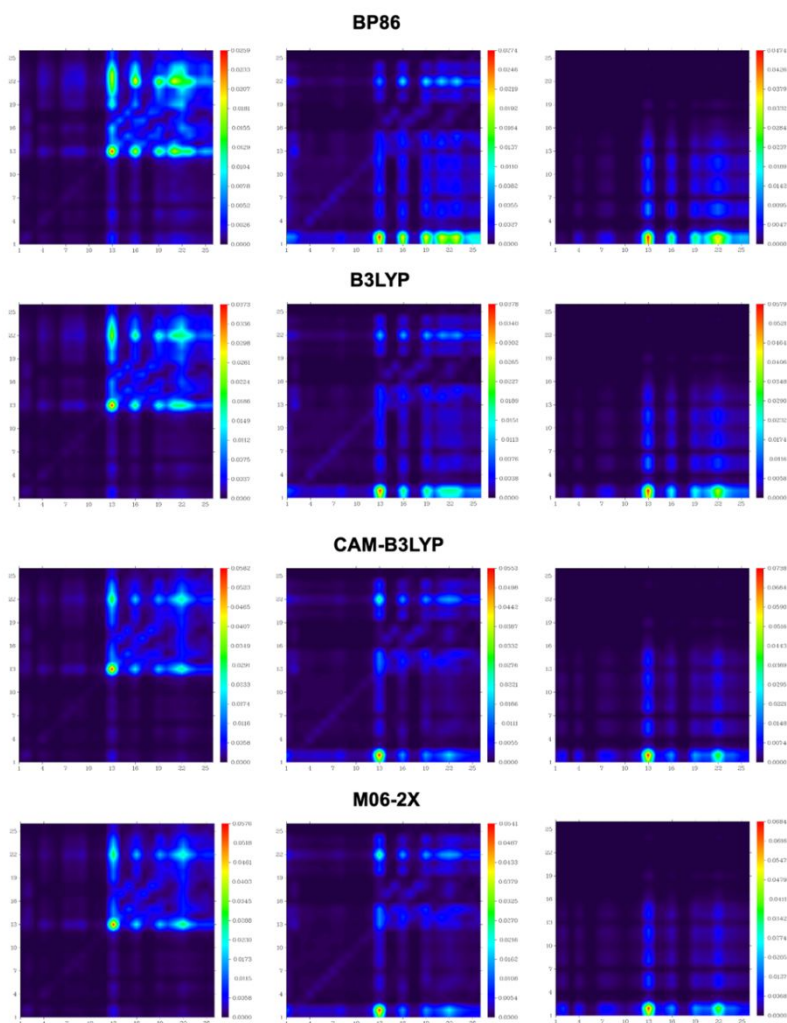

Figure S3. Heat maps of transition density matrix (TDM) graphs for  $S_1$  states of a) LE b) HLCT and c) CT states calculated with different XC functionals.

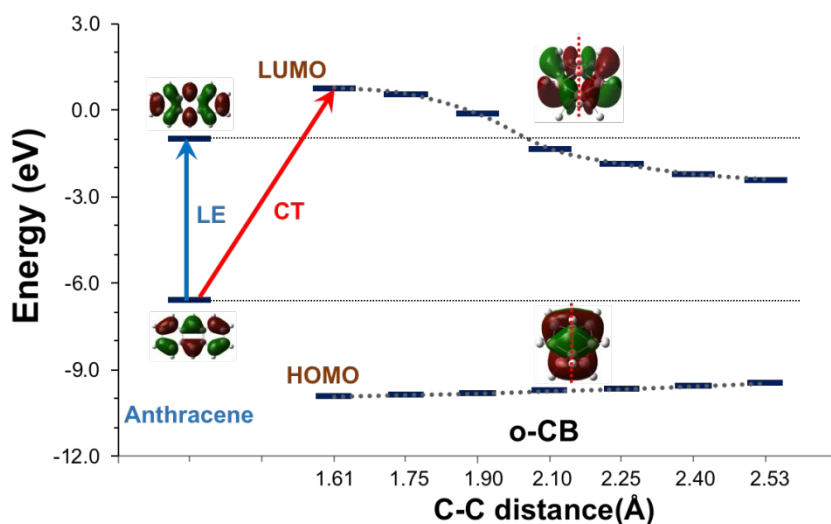

Figure S4. Relative energies of the frontier levels for *o*-CB and *Ant* moieties with respect to  $C_1$ - $C_2$  distance on *o*-CB.

Table S4.  $\Delta r$  and  $\Lambda$  values for the TDMs given in Figure 2 for selective  $S_1 \rightarrow S_0$  transitions on the PESs with respect to  $\varphi$  at fixed  $C_1$ - $C_2$  bond lengths.

|                       | $C_1$ - $C_2 = 1.60 \text{ \AA}$ |           | $C_1$ - $C_2 = 2.25 \text{ \AA}$ |           | $C_1$ - $C_2 = 2.53 \text{ \AA}$ |           |
|-----------------------|----------------------------------|-----------|----------------------------------|-----------|----------------------------------|-----------|
|                       | $\Delta r$ (Å)                   | $\Lambda$ | $\Delta r$ (Å)                   | $\Lambda$ | $\Delta r$ (Å)                   | $\Lambda$ |
| $\varphi = 0^\circ$   | 0.2                              | 0.83      | 3.7                              | 0.28      | 3.9                              | 0.25      |
| $\varphi = -45^\circ$ | 0.2                              | 0.82      | 0.8                              | 0.75      | 3.1                              | 0.47      |
| $\varphi = -90^\circ$ | 0.2                              | 0.83      | 0.9                              | 0.73      | 1.4                              | 0.69      |

Table S5.  $\Delta r$  and  $\Lambda$  values for the TDMs given in Figure 3 for selective  $S_1 \rightarrow S_0$  transitions on the PESs with respect to  $C_1$ - $C_2$  bond lengths at fixed  $\varphi$ .

|                                  | $\varphi = -13^\circ$ |           | $\varphi = -87^\circ$ |           | $\varphi = 0^\circ$ |           |
|----------------------------------|-----------------------|-----------|-----------------------|-----------|---------------------|-----------|
|                                  | $\Delta r$ (Å)        | $\Lambda$ | $\Delta r$ (Å)        | $\Lambda$ | $\Delta r$ (Å)      | $\Lambda$ |
| $C_1$ - $C_2 = 1.60 \text{ \AA}$ | 0.2                   | 0.84      | 0.2                   | 0.83      | 0.2                 | 0.83      |
| $C_1$ - $C_2 = 2.00 \text{ \AA}$ | 0.4                   | 0.81      | 0.4                   | 0.80      | 0.3                 | 0.82      |
| $C_1$ - $C_2 = 2.50 \text{ \AA}$ | 3.8                   | 0.31      | 1.4                   | 0.69      | 3.9                 | 0.25      |

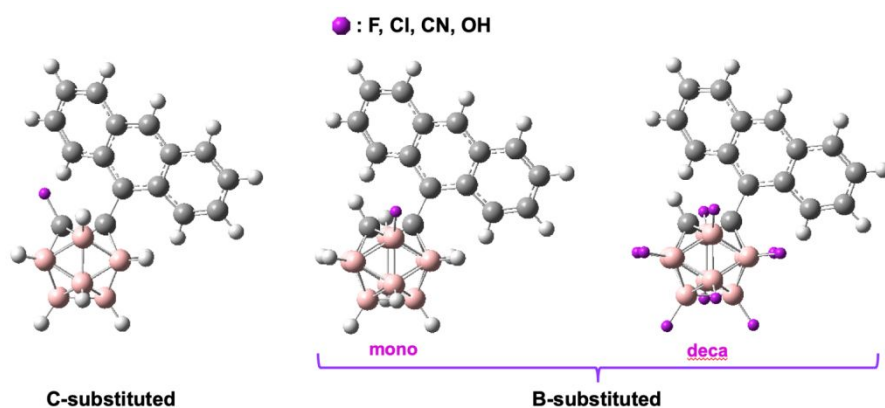

Figure S5. Positions of substituents for *o*-CB-*Ant* derivatives (X: F, Cl, CN and OH).

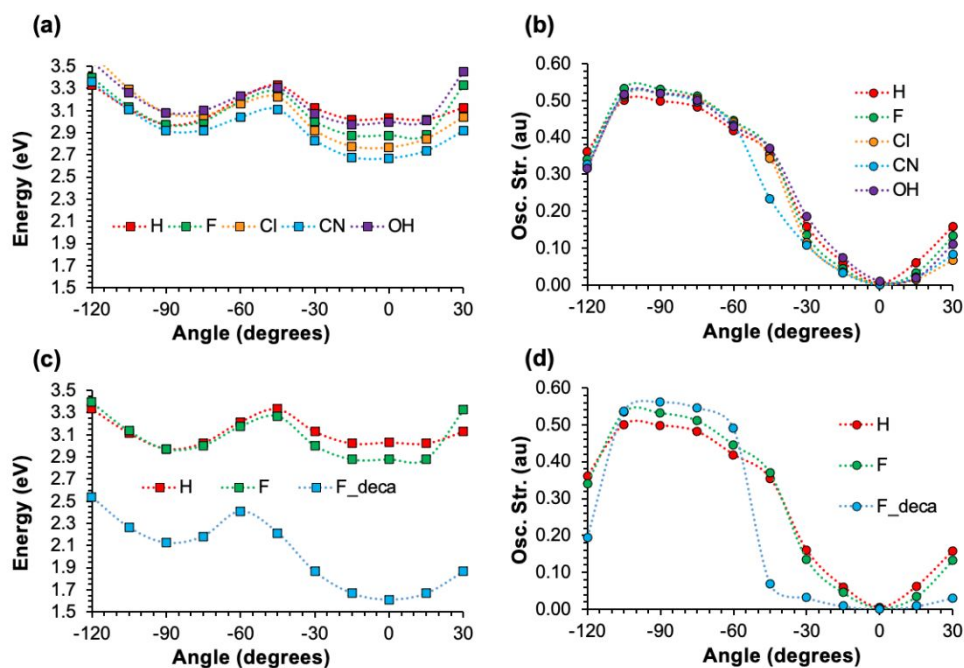

Figure S6. Potential energy surfaces with respect to  $\varphi$  for partially stretched and fixed  $C_1-C_2$  bond lengths for the B-substituted derivatives of the *o*-CB-*Ant*. For these surfaces,  $\varphi = -90^\circ$  corresponds to the HLCT state for each system.

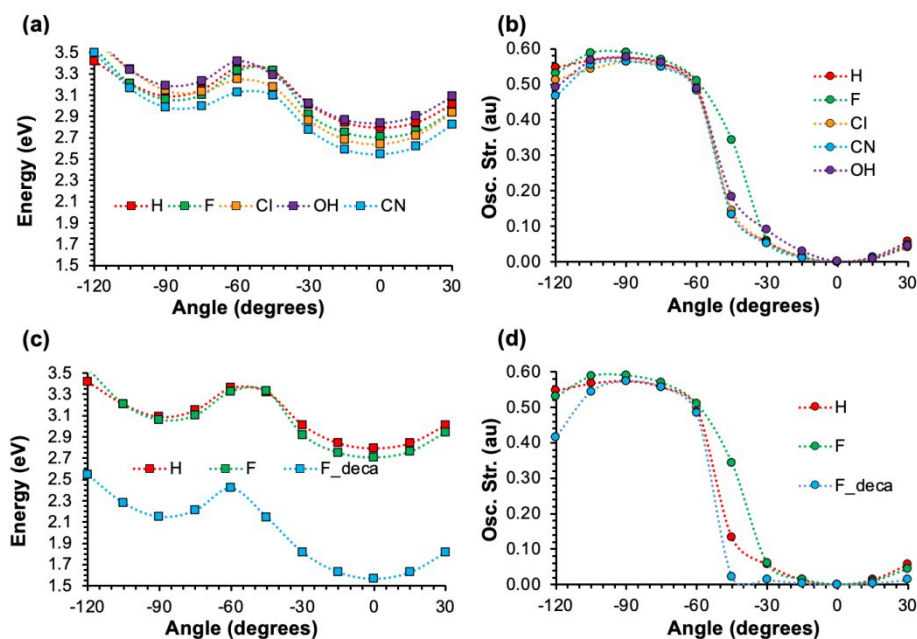

Figure S7. Potential energy surfaces with respect to  $\varphi$  for fully stretched and fixed  $C_1-C_2$  bond lengths for the B-substituted derivatives of the *o*-CB-*Ant*. For these surfaces,  $\varphi = 0^\circ$  corresponds to the CT state for each system.

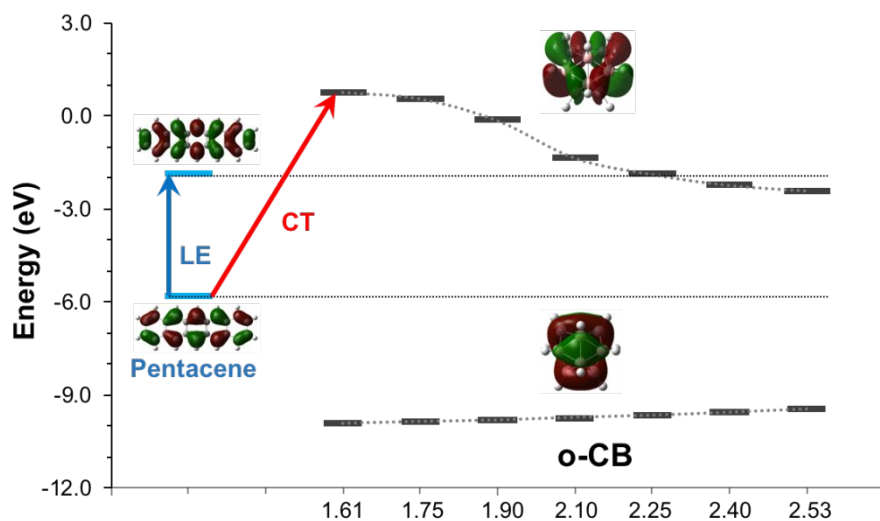

Figure S8. Relative energies of the frontier levels for *o*-CB and *Pnt* moieties with respect to  $C_1-C_2$  distance on *o*-CB.

## References

- (1) Naito, H.; Nishino, K.; Morisaki, Y.; Tanaka, K.; Chujo, Y. Solid-State Emission of the Anthracene-*o*-Carborane Dyad from the Twisted-Intramolecular Charge Transfer in the Crystalline State. *Angew Chem Int Edit* **2017**, *56* (1), 254.
